# Supplementary material
Source: publisher site journal article supplement (https://www.dovepress.com/article/332224)
Supplement: Supplementary file 1 [file get_supplementary_file.php]

**[Supplementary](D:/Youdao/Dict/8.9.6.0/resultui/html/index.html" \l "/javascript:;) [materials](D:/Youdao/Dict/8.9.6.0/resultui/html/index.html" \l "/javascript:;)**

**Machine learning analysis reveals abnormal** **static and dynamic low-frequency oscillations indicative of long-term menstrual pain in** **primary dysmenorrhea patients**


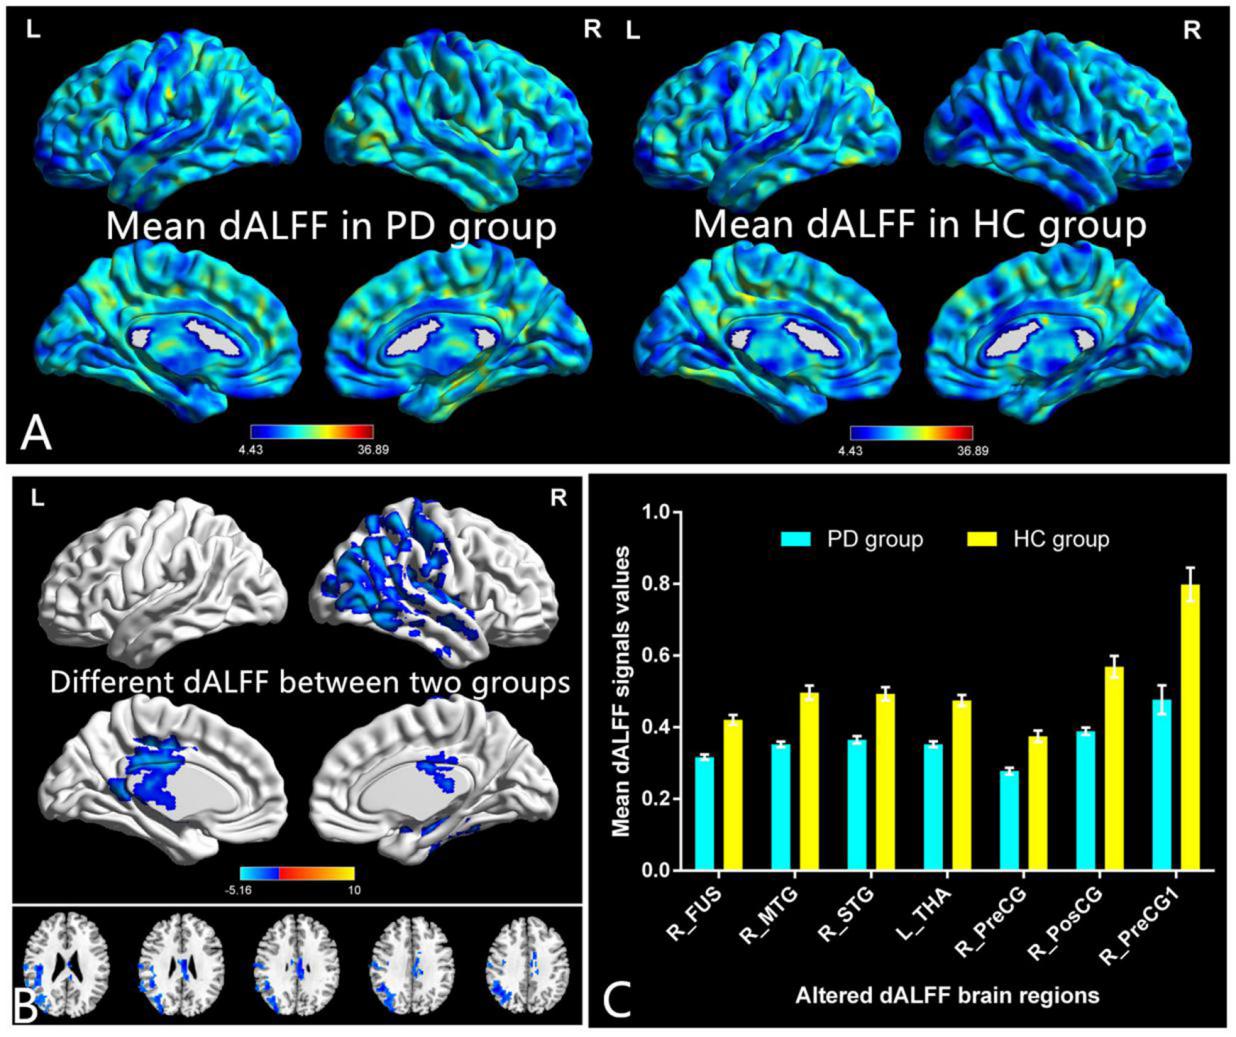


**FigureS1**:**Note:**Distribution patterns of dALFF variance (window lengths (30 TRs [60s]) were observed at the group level in PD and HC groups in the typical frequency band (0.01–0.08 Hz).(A) Different dALFF values between two groups.(**B**) The mean values of altered dALFF between the two groups were shown with a histogram.(**C**)

**Abbreviations:** dALFF, dynamic amplitude of low-frequency fluctuation; PD,Primary Dysmenorrhea; HC, health controls; L, left; R, right ;


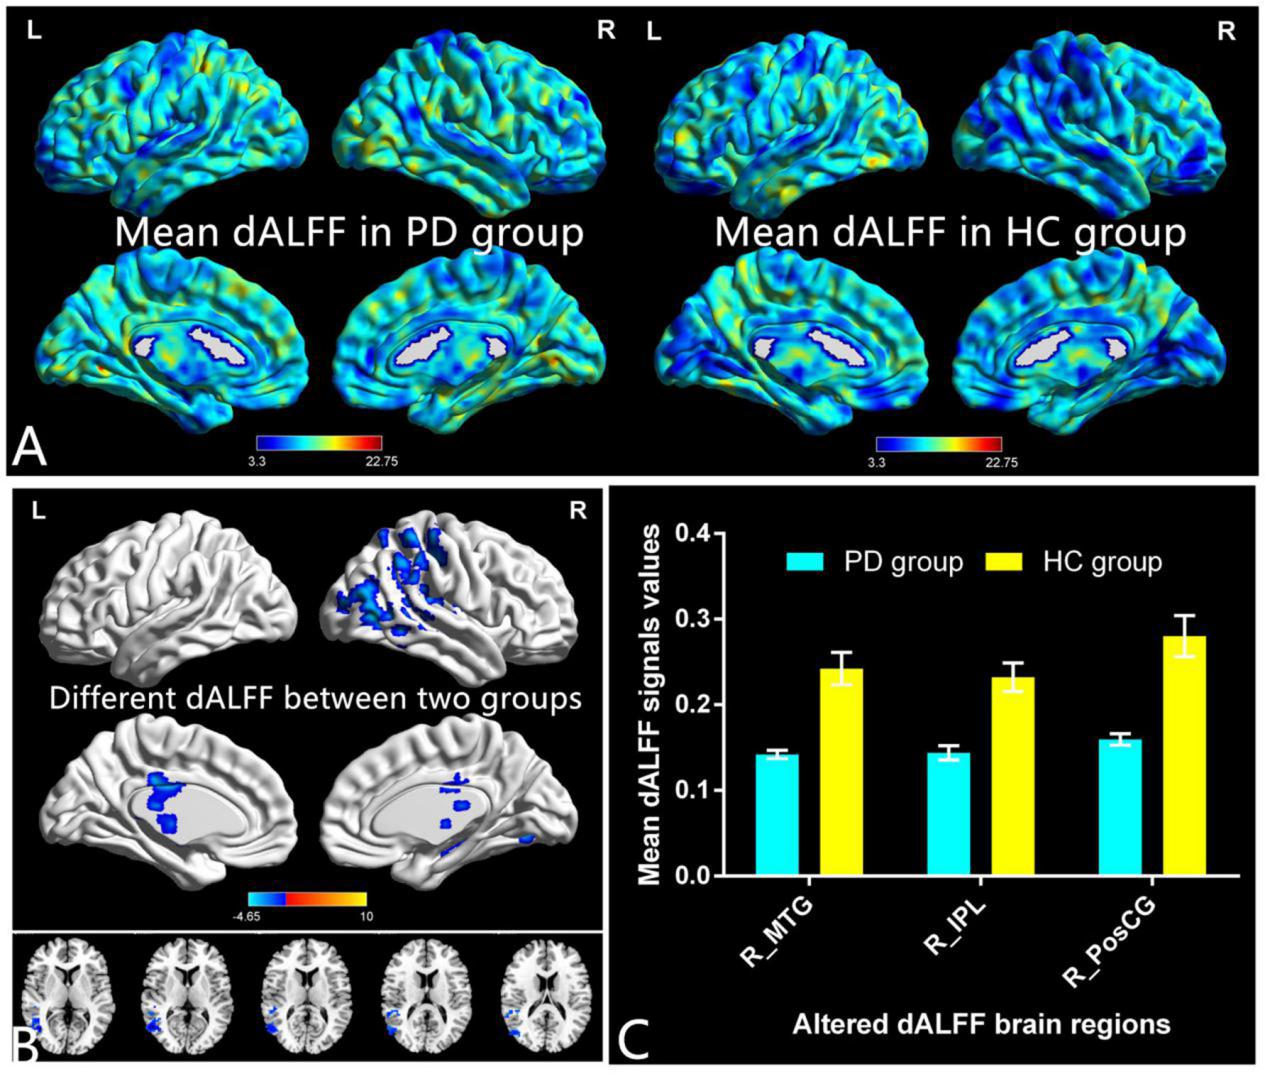


**Figure S2**: **Note:**Distribution patterns of dALFF variance (window lengths (100 TRs [200s]) were observed at the group level in PD and HC groups in the typical frequency band (0.01–0.08 Hz).(A) Different dALFF values between two groups.(**B**) The mean values of altered dALFF between the two groups were shown with a histogram.(**C**)

**Abbreviations:** dALFF, dynamic amplitude of low-frequency fluctuation; PD,Primary Dysmenorrhea; HC, health controls; L, left; R, right ;

**TableS1:** Different dALFF values between two groups window lengths (30 TRs [60 s] )

| Condition | Brain regions | BA | Peak T-scores | MNI coordinates (x,y,z) | Cluster size (voxels) |
| --- | --- | --- | --- | --- | --- |
| PD<HC | Fusiform_R | - | -4.3703 | -3 -45 -27 | 306 |
| PD<HC | Temporal_Mid_R | - | -5.1628 | 42 -66 6 | 1781 |
| PD<HC | Temporal_Sup_R | - | -3.971 | 51 -9 -6 | 66 |
| PD<HC | Thalamus_L | - | -5.1187 | -6 -12 27 | 354 |
| PD<HC | Precentral_R | - | -4.3405 | 33 -15 48 | 56 |
| PD<HC | Postcentral_R | - | -4.9757 | 42 -42 63 | 447 |
| PD<HC | Precentral_R | - | -4.3845 | 9 -21 78 | 63 |

**Note:**The statistical threshold was set at the voxel level with p<0.01 for multiple comparisons using Gaussian random-field theory.(voxel-level P<0.01, GRF correction, cluster-level P<0.05).

**Abbreviations:** dALFF, dynamic amplitude of low-frequency fluctuation; PD, Primary Dysmenorrhea; HC, health controls; L, left; R, right ; GRF, Gaussian random field;

**Table S2:** Different dALFF values between two groups window lengths (100 TRs [200 s])

| Condition | Brain regions | BA | Peak T-scores | MNI coordinates (x,y,z) | Cluster size (voxels) |
| --- | --- | --- | --- | --- | --- |
| PD<HC | Temporal_Mid_R | - | -4.6528 | 45 -66 6 | 256 |
| PD<HC | Parietal_Inf_R | - | -4.1517 | 51 -42 30 | 84 |
| PD<HC | Postcentral_R | - | -4.0971 | 33 -60 60 | 158 |

**Note:**The statistical threshold was set at the voxel level with p<0.01 for multiple comparisons using Gaussian random-field theory.(voxel-level P<0.01, GRF correction, cluster-level P<0.05).

**Abbreviations:** dALFF, dynamic amplitude of low-frequency fluctuation; PD, Primary Dysmenorrhea; HC, health controls; L, left; R, right; GRF,Gaussian random field;
